# Supplementary material for: DNA assembled single-walled carbon nanotube nanocomposites for high efficiency dye-sensitized solar cells
Source: Royal Society of Chemistry journal article supplement (doi:10.1039/c3ta11556a), 2013-01-01
Supplement: c3ta11556a.pdf [file c3ta11556a.pdf]

## Electronic Supplementary Information

### DNA Assembled Single-Walled Carbon Nanotubes Nanocomposites for High Efficiency Dye-sensitized Solar Cells

Xiaoliang Zhang,<sup>a</sup> Jianhua Liu,\*<sup>a</sup> Songmei Li,<sup>a</sup> Xiaohong Tan,<sup>b</sup> Jindan Zhang,<sup>a</sup> Mei Yu<sup>a</sup> and Mengge Zhao<sup>c</sup>

<sup>a</sup> School of Materials Science and Engineering, Beihang University,  
Beijing 100191, China

E-mail: [liujh@buaa.edu.cn](mailto:liujh@buaa.edu.cn)

<sup>b</sup> Department of Chemistry and Center for Nucleic Acids Science and Technology, Carnegie Mellon  
University,

Pittsburgh, PA 15213, United States

<sup>c</sup> Department of Chemical Engineering and Materials Science

Michigan State University,

East Lansing, MI 48824, United States

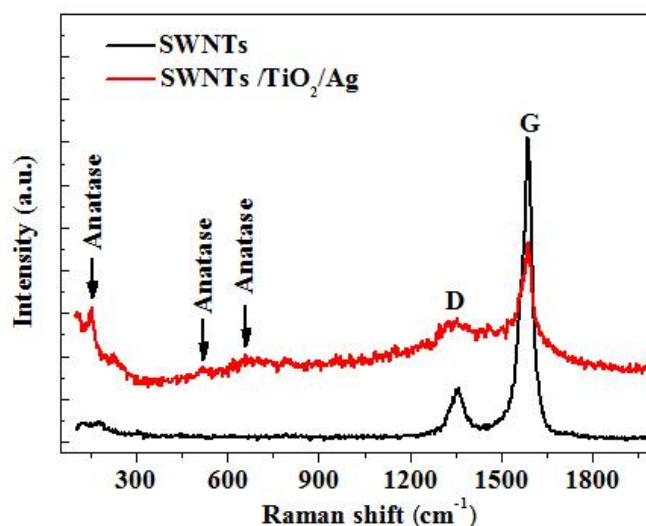

Fig. S1 Raman spectroscopy of SWNTs and SWNTs/TiO<sub>2</sub>/Ag nanocomposites.

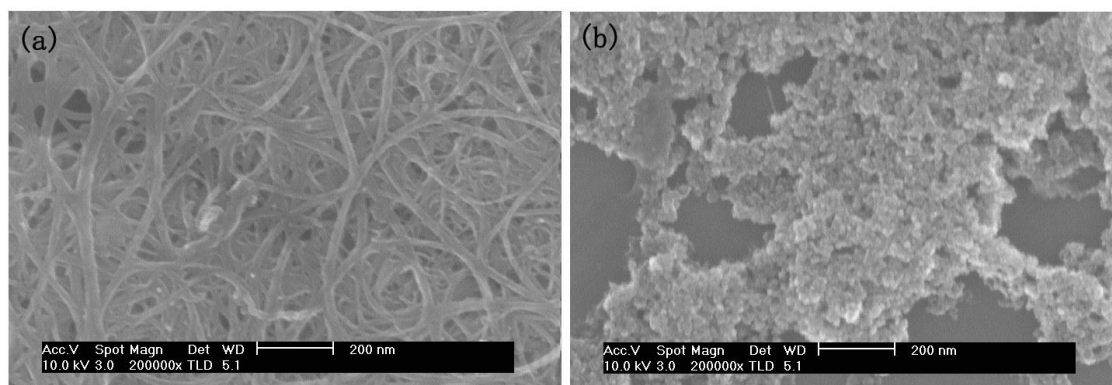

**Fig. S2** FESEM images of (a) SWNTs and SWNT/TiO<sub>2</sub>/Ag nanocomposites.

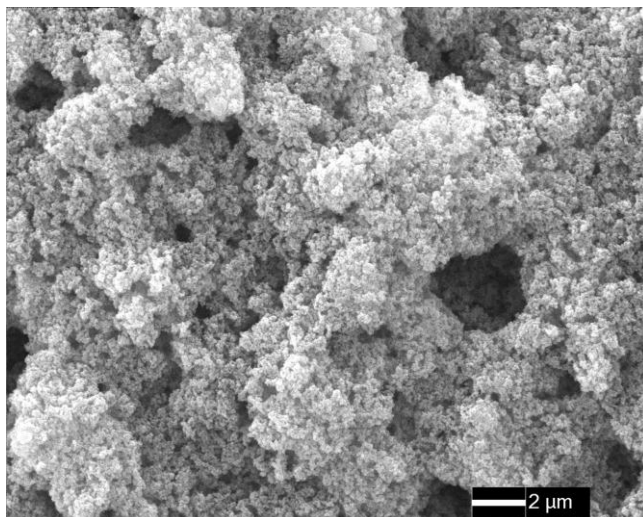

**Fig. S3** High-magnification FESEM image of photoanode film. The photoanode film has large number of micro pores.

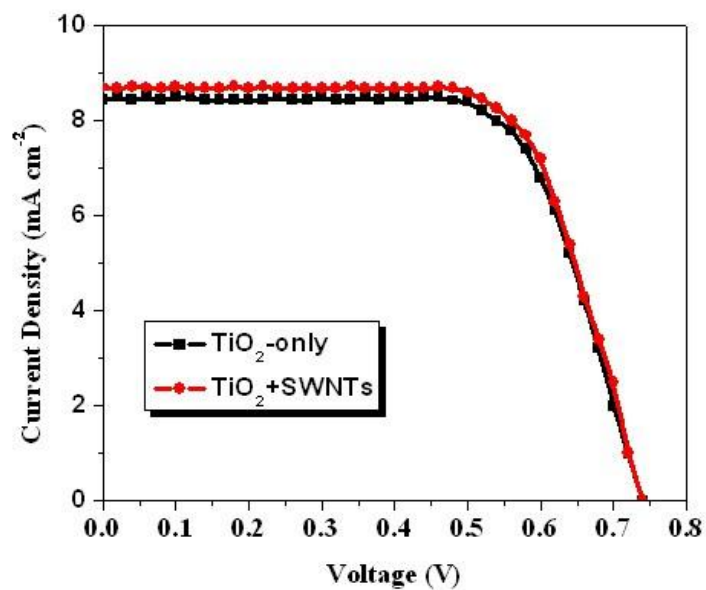

**Fig. S4** *J-V* curves of DSSCs fabricated with TiO<sub>2</sub>-only and semiconducting SWNTs. The semiconducting SWNTs (0.15 wt%) were directly incorporated into TiO<sub>2</sub> NPs paste to prepare the photoanode film without applying DNA.

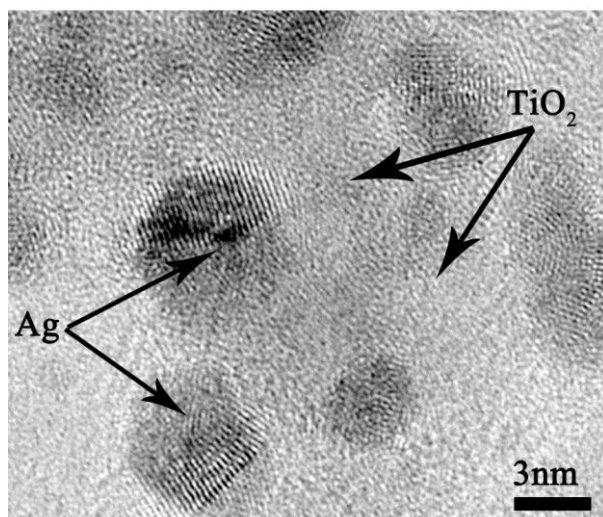

**Fig. S5** High-magnification TEM image of SWNTs/TiO<sub>2</sub>/Ag nanocomposites.
